# Supplementary material for: Multidimensional frameworks constructed from Keggin-type heteropoly blue of molybdenum–tungsten cluster
Source: Royal Society of Chemistry journal article supplement (doi:10.1039/c0ce00514b), 2010-11-12
Supplement: c0ce00514b.pdf [file c0ce00514b.pdf]

## Supporting information

Magnetic susceptibility data were recorded using a Quantum Design SQUID MPMS XL-5 magnetometer. Variable temperature susceptibility measurements were carried out in the temperature range of 2–300 K at a magnetic field of 1000 Oe on polycrystalline samples. The experimental susceptibilities were corrected for the Pascal's constants.

Infrared spectra of solid samples were obtained on a BRUKER Vertex 70 FTIR spectrometer in the 400–4000  $\text{cm}^{-1}$  region with a KBr pellet. Elemental analyses (C, H, N) were performed on a Perkin-Elmer 2400 CHN. TG analysis was performed on a Perkin-Elmer TGA7 instrument in flowing  $\text{N}_2$  with a heating rate of 10  $^\circ\text{C min}^{-1}$ .

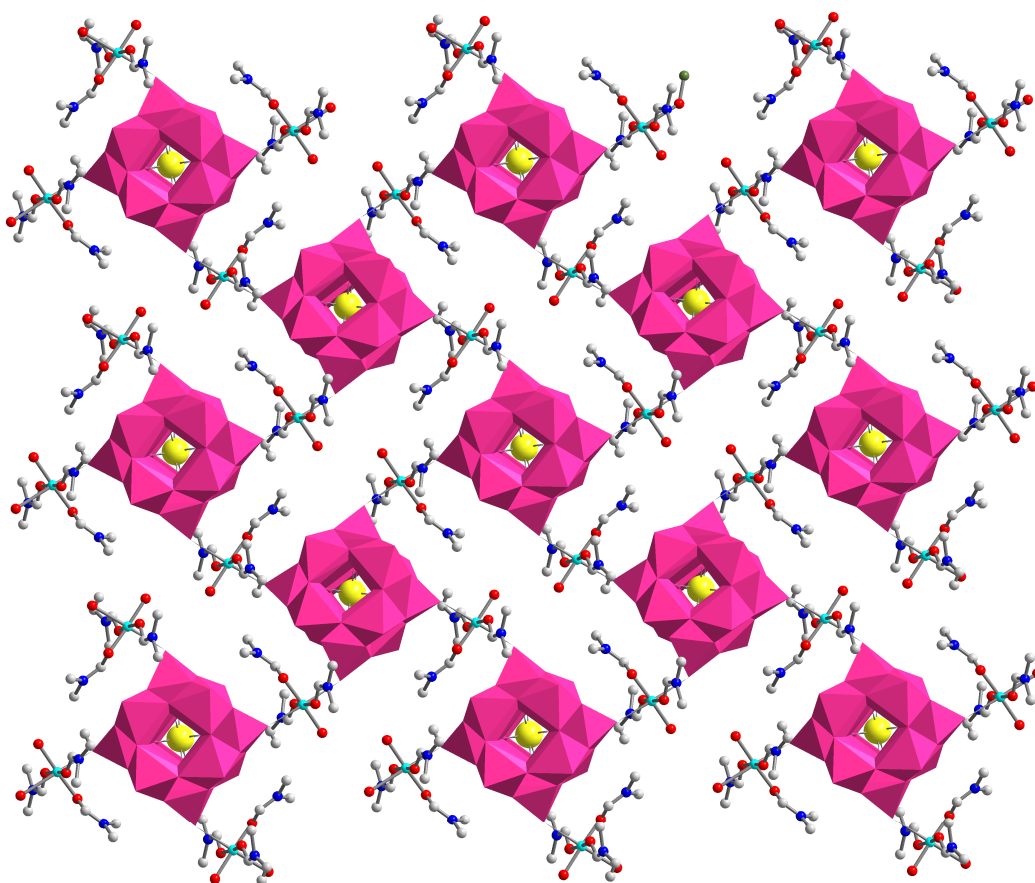

**Fig. S1** Polyhedral and ball-and-stick representation view of **1** viewed along the *c* axis. All the H atoms, isolated water molecules are omitted. (Ge, orange; W, Pink; Cu, turquoise; O, red; C, gray, N, blue).

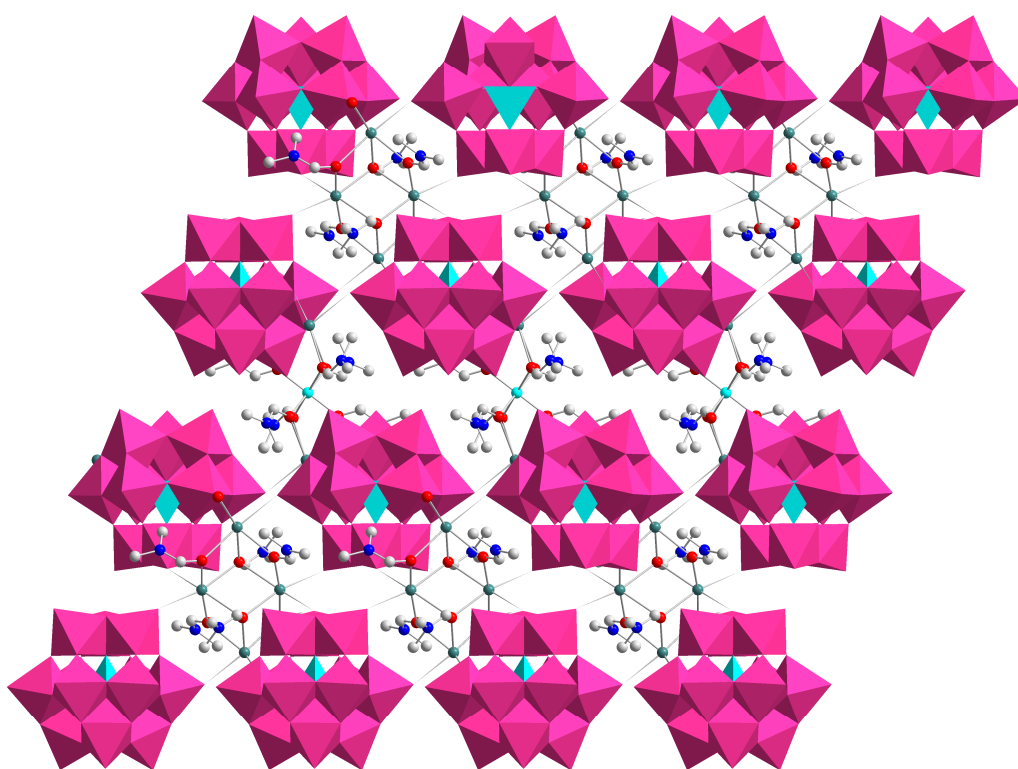

**Fig. S2** Polyhedral and ball-and-stick representation view of **2** along the *c* axis.

All the H atoms are omitted. (Ge, orange; W, Pink; Cu, turquoise; O, red; C, gray; N, blue; K, teal).

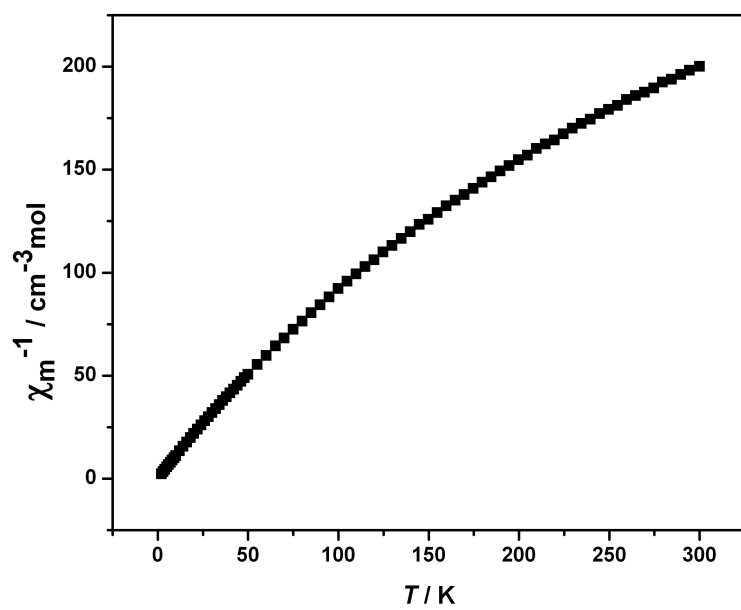

Fig. S3 Plot of  $\chi_m^{-1}$  vs  $T$  for 1.

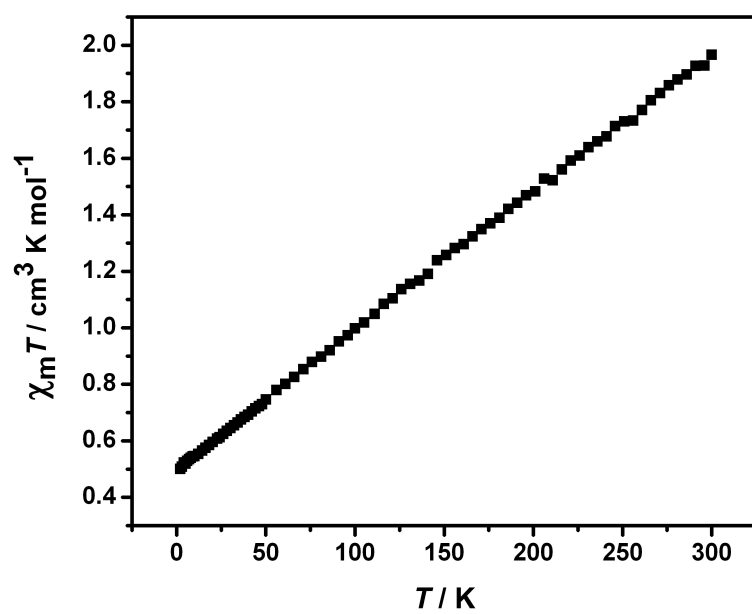

Fig. S4 Plot of  $\chi_m T$  vs  $T$  for 2.

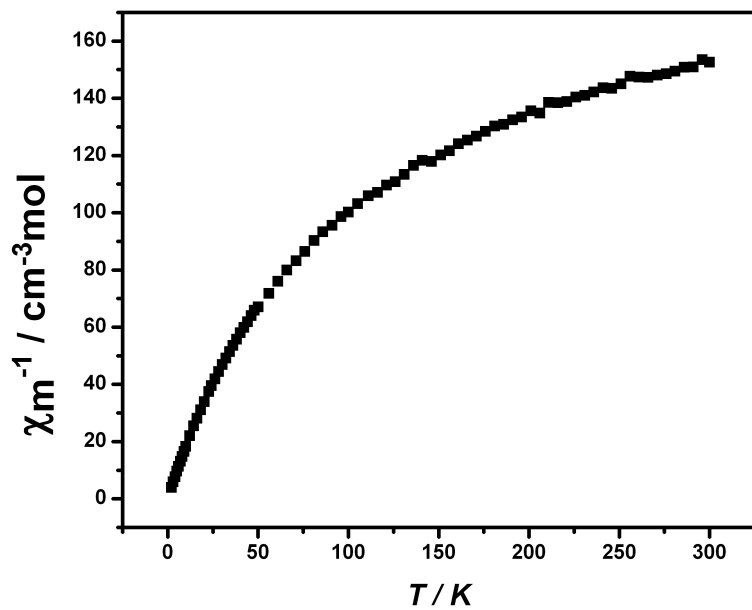

Fig. S5 Plot of  $\chi_m^{-1}$  vs  $T$  for 2.

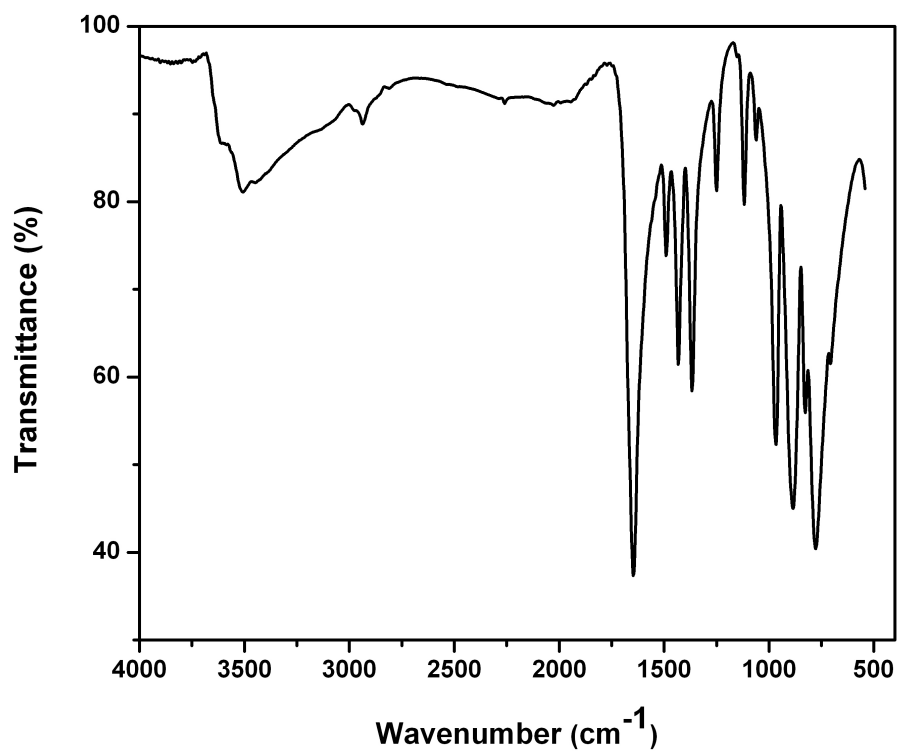

Fig. S6 The IR spectra of the compound 1.

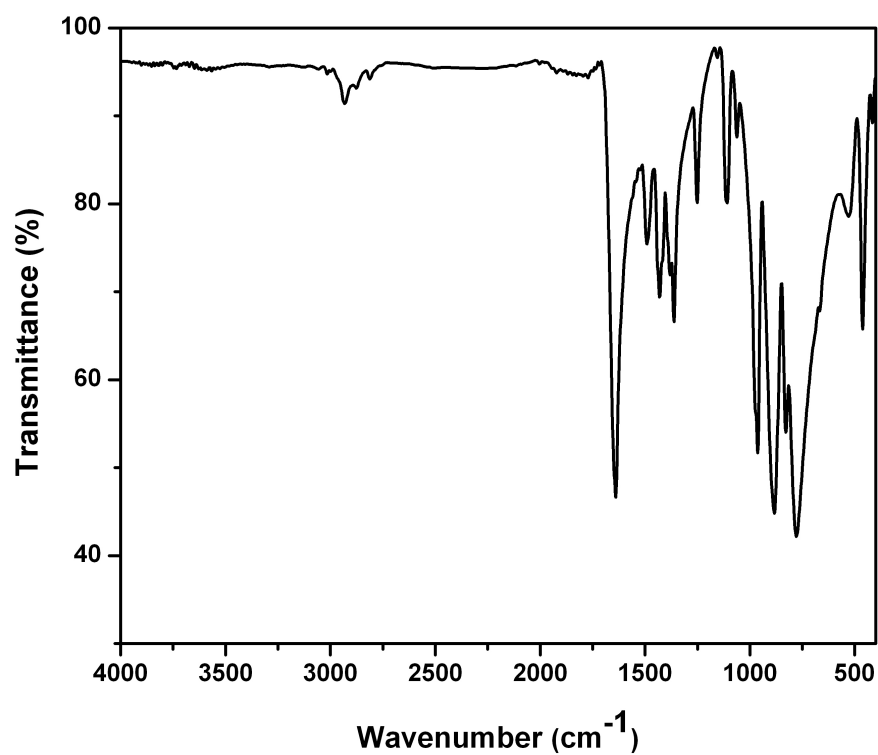

Fig. S7 The IR spectra of the compound 2.

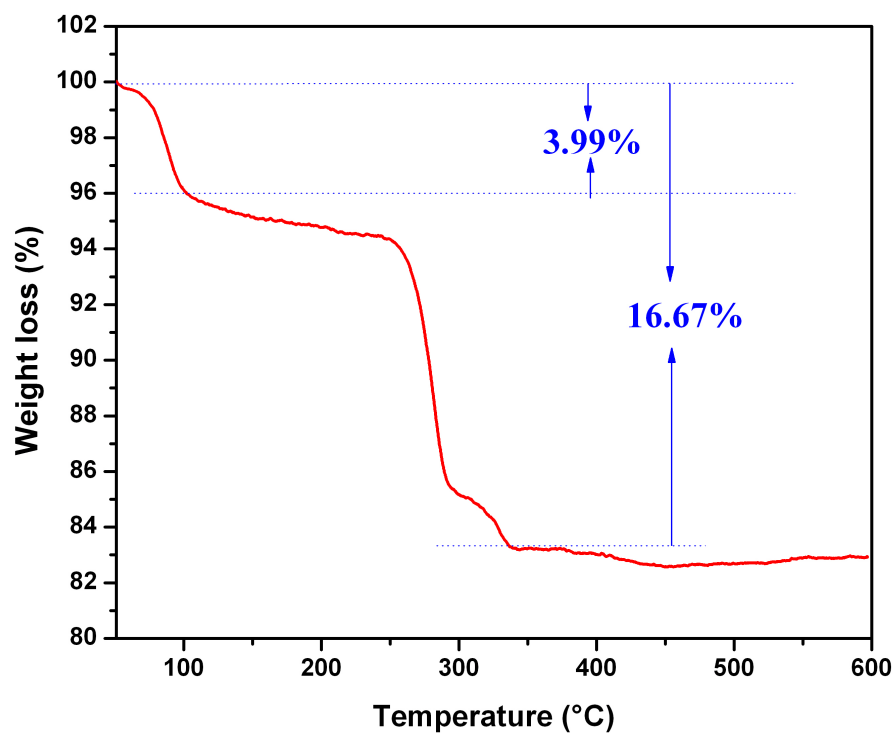

Fig. S8 The TG curve for compound 1.

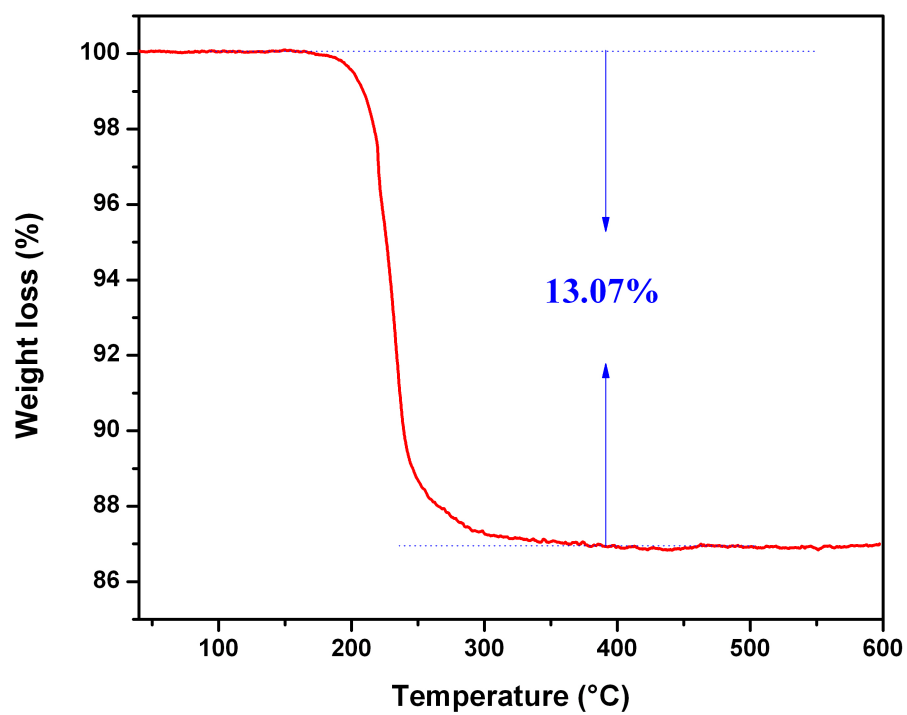

**Fig. S9** The TG curve for compound 2.

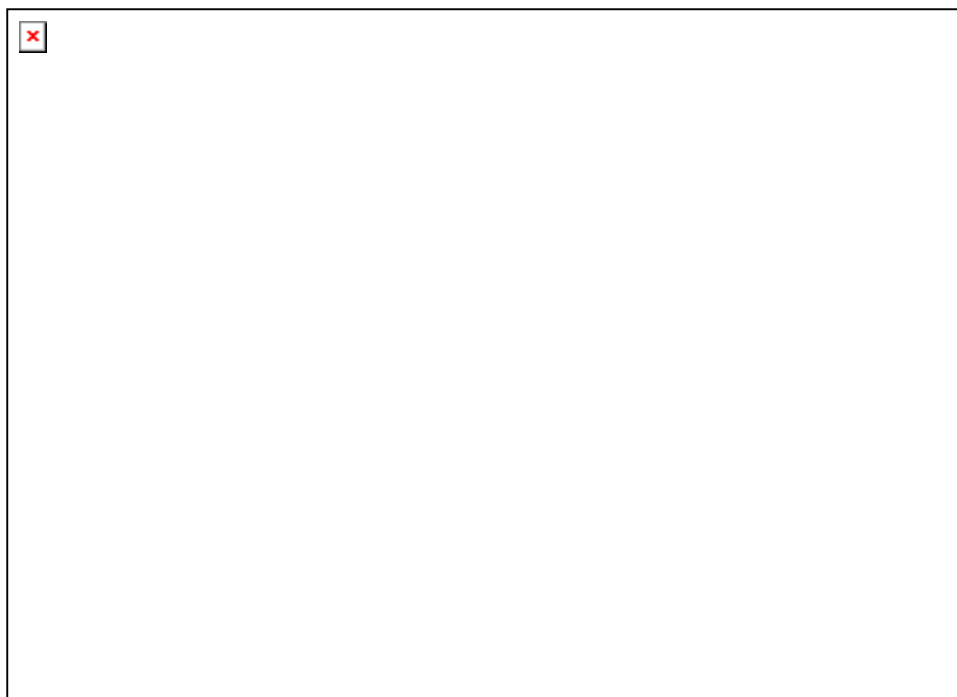

**Fig. S10** UV-vis spectra of compound **1** in water solution within the range of 190-1000 nm.

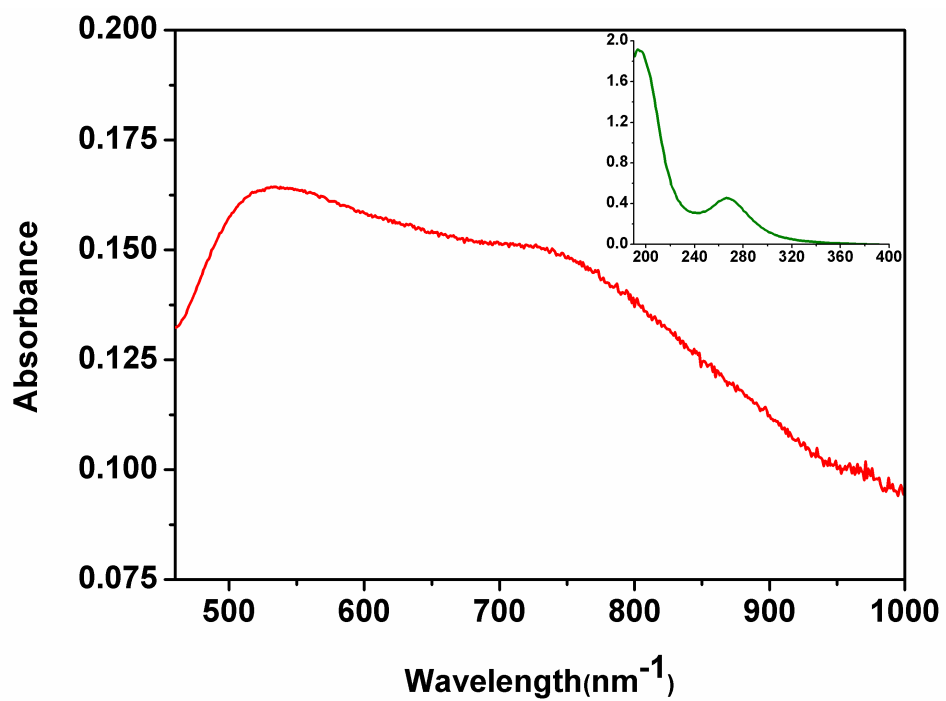

**Fig. S11** UV-vis spectra of compound **2** in water solution within the range of 190-1000 nm.
